# Supplementary material for: Role of Crosslinking for Agonistic CD40 Monoclonal Antibodies as Immune Therapy of Cancer
Source: Oxford University Press journal article supplement (doi:10.1158/2326-6066.cir-13-0152), 2013-11-05
Supplement: 23266066cir130152-sup-fig3.pdf [file 23266066cir130152-sup-fig3.pdf]

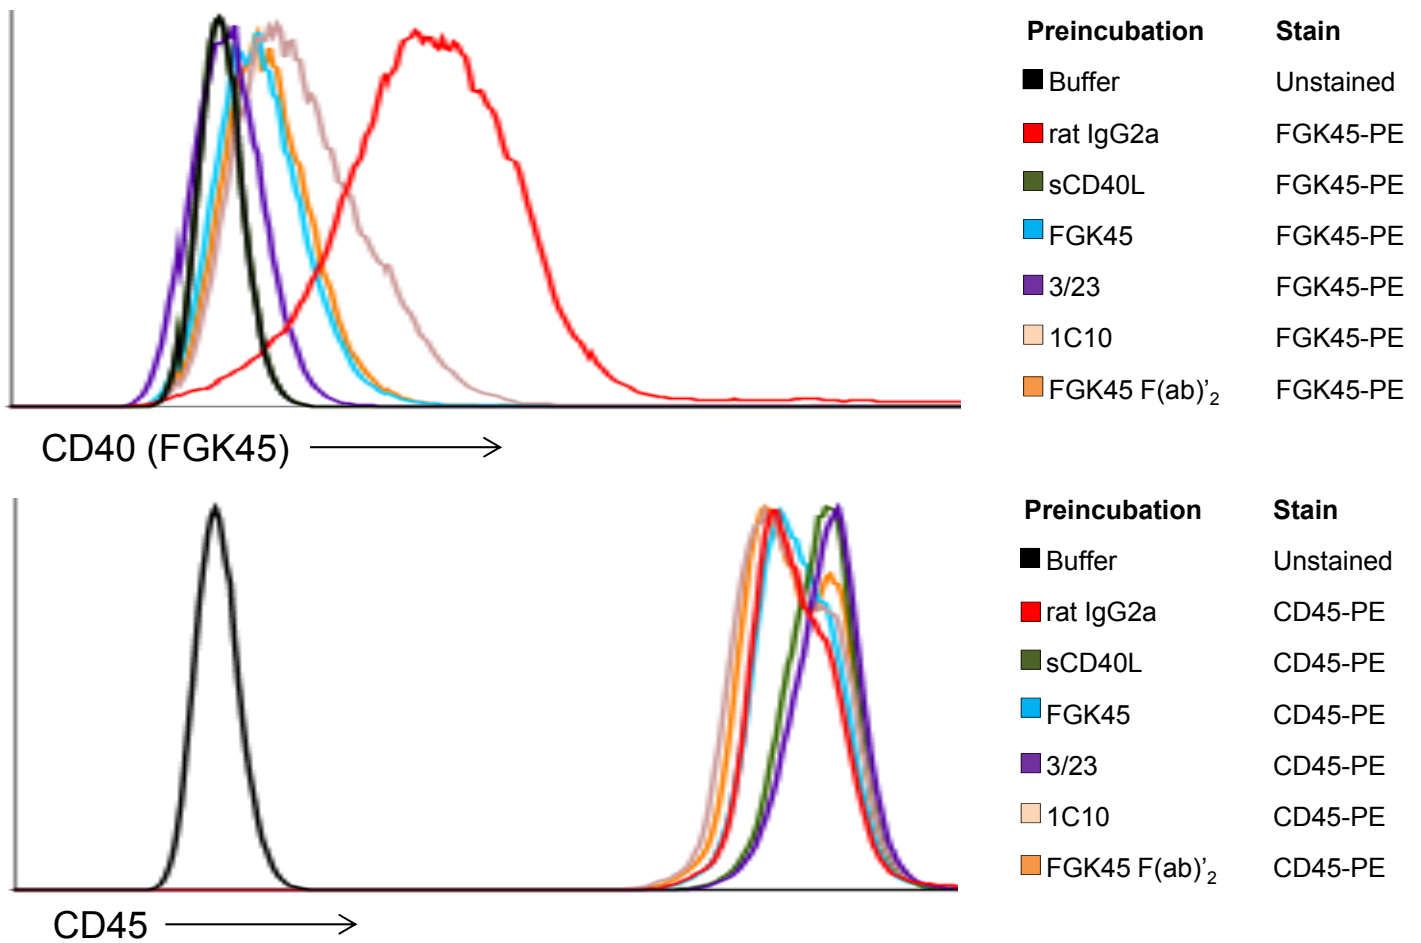

**Supplementary Fig. 3:** CD40 antibody fine specificity. Murine splenic B cells were preincubated with buffer only and left unstained (black), or preincubated with rat IgG2a (red), soluble CD40L (green), FGK45 (blue), 3/23 (purple), 1C10 (beige), or FGK45 F(ab)<sub>2</sub> (orange) and then stained with PE-conjugated FGK45 or CD45-PE (as a control) and subsequently measured by flow cytometry.
